# Supplementary material
Source: PubMed Central journal article supplement (PMC5683349)
Supplement: NIHMS74775-supplement-Appendix.pdf [file NIHMS74775-supplement-Appendix.pdf]

## Appendix A: Channel maps

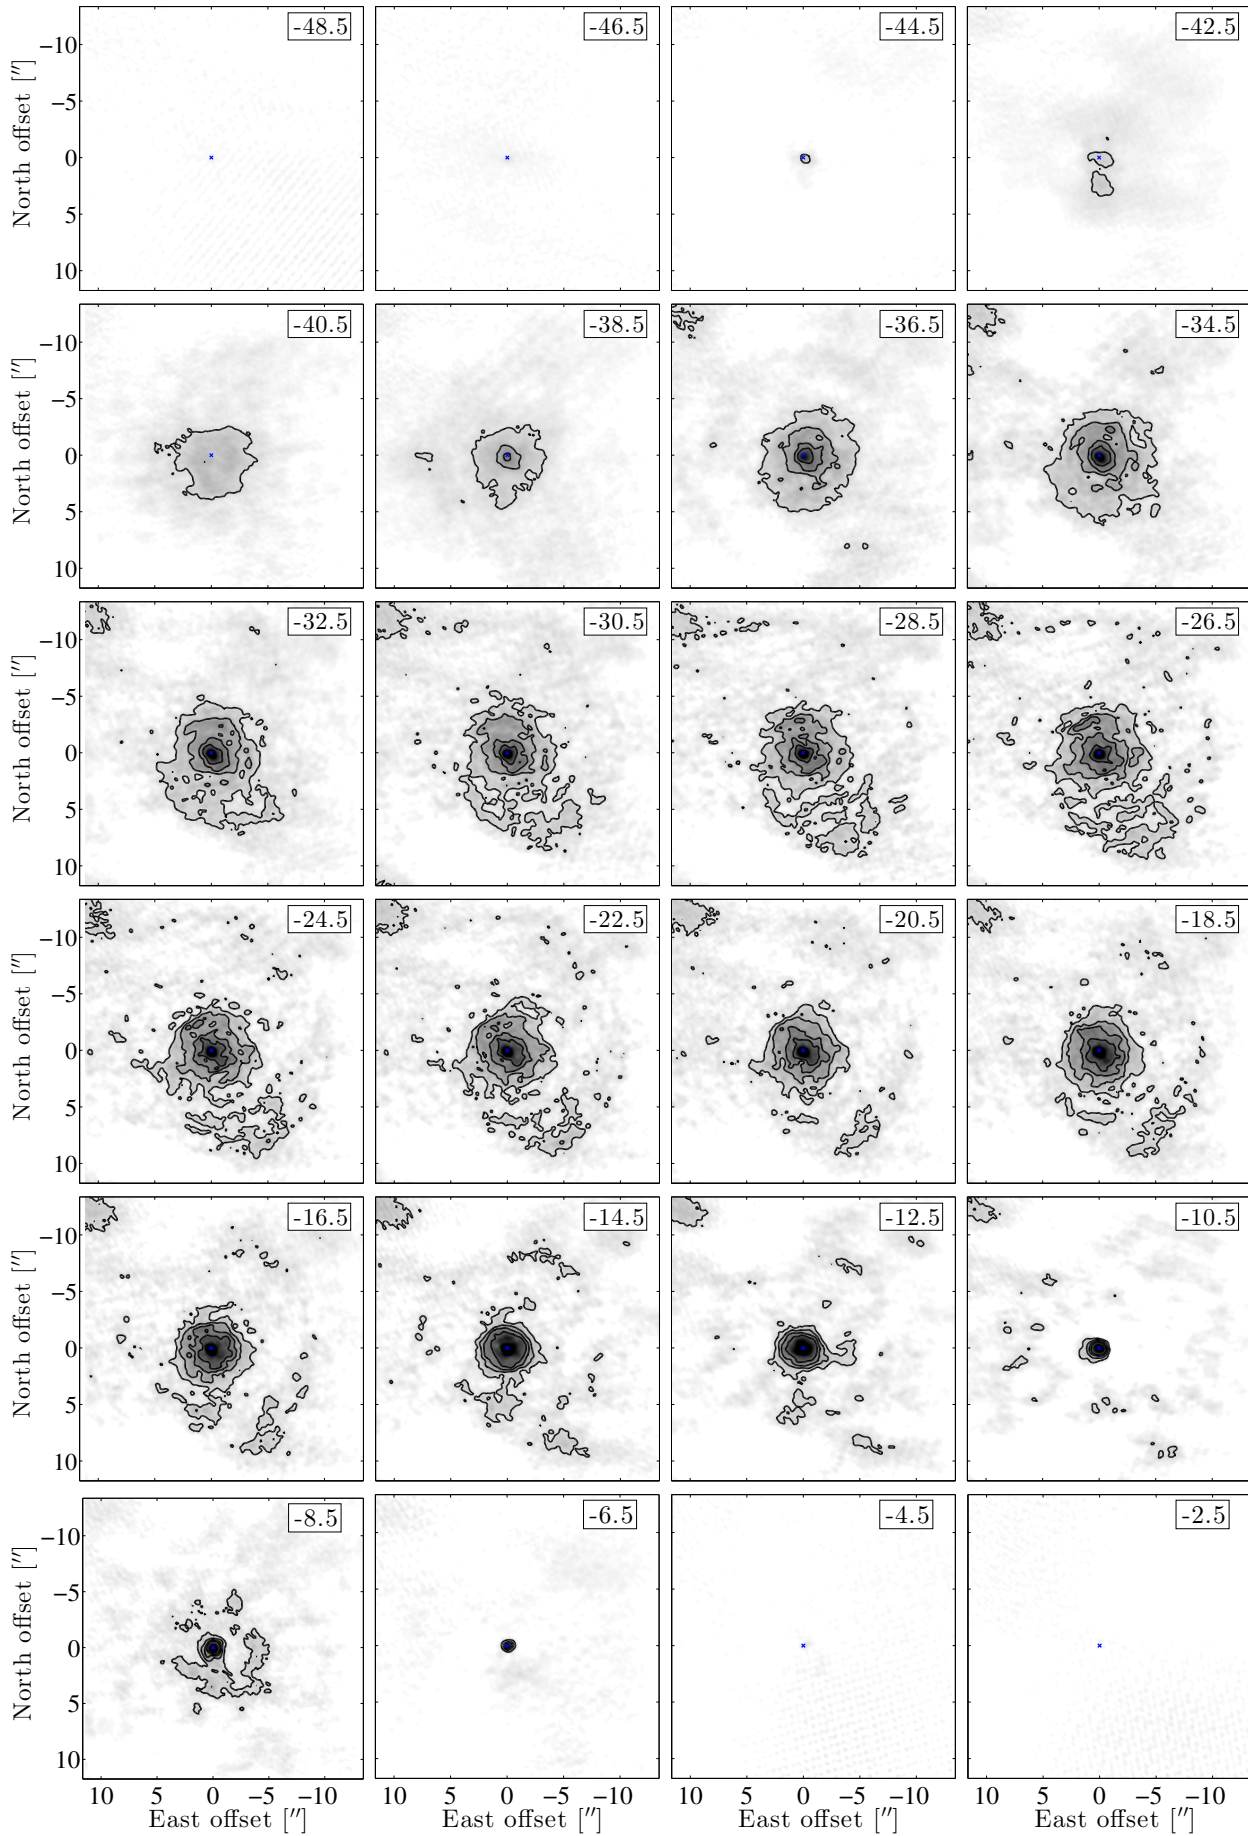

**Fig. A.1.** ALMA CO(3-2) channel maps. The LSR velocity of each channel is given in the upper right corner legend. Contours are given at 10, 20, 30, and  $40\sigma$ , where  $\sigma$  has been measured in the emission-free channels. The blue cross marks the peak of the continuum emission.

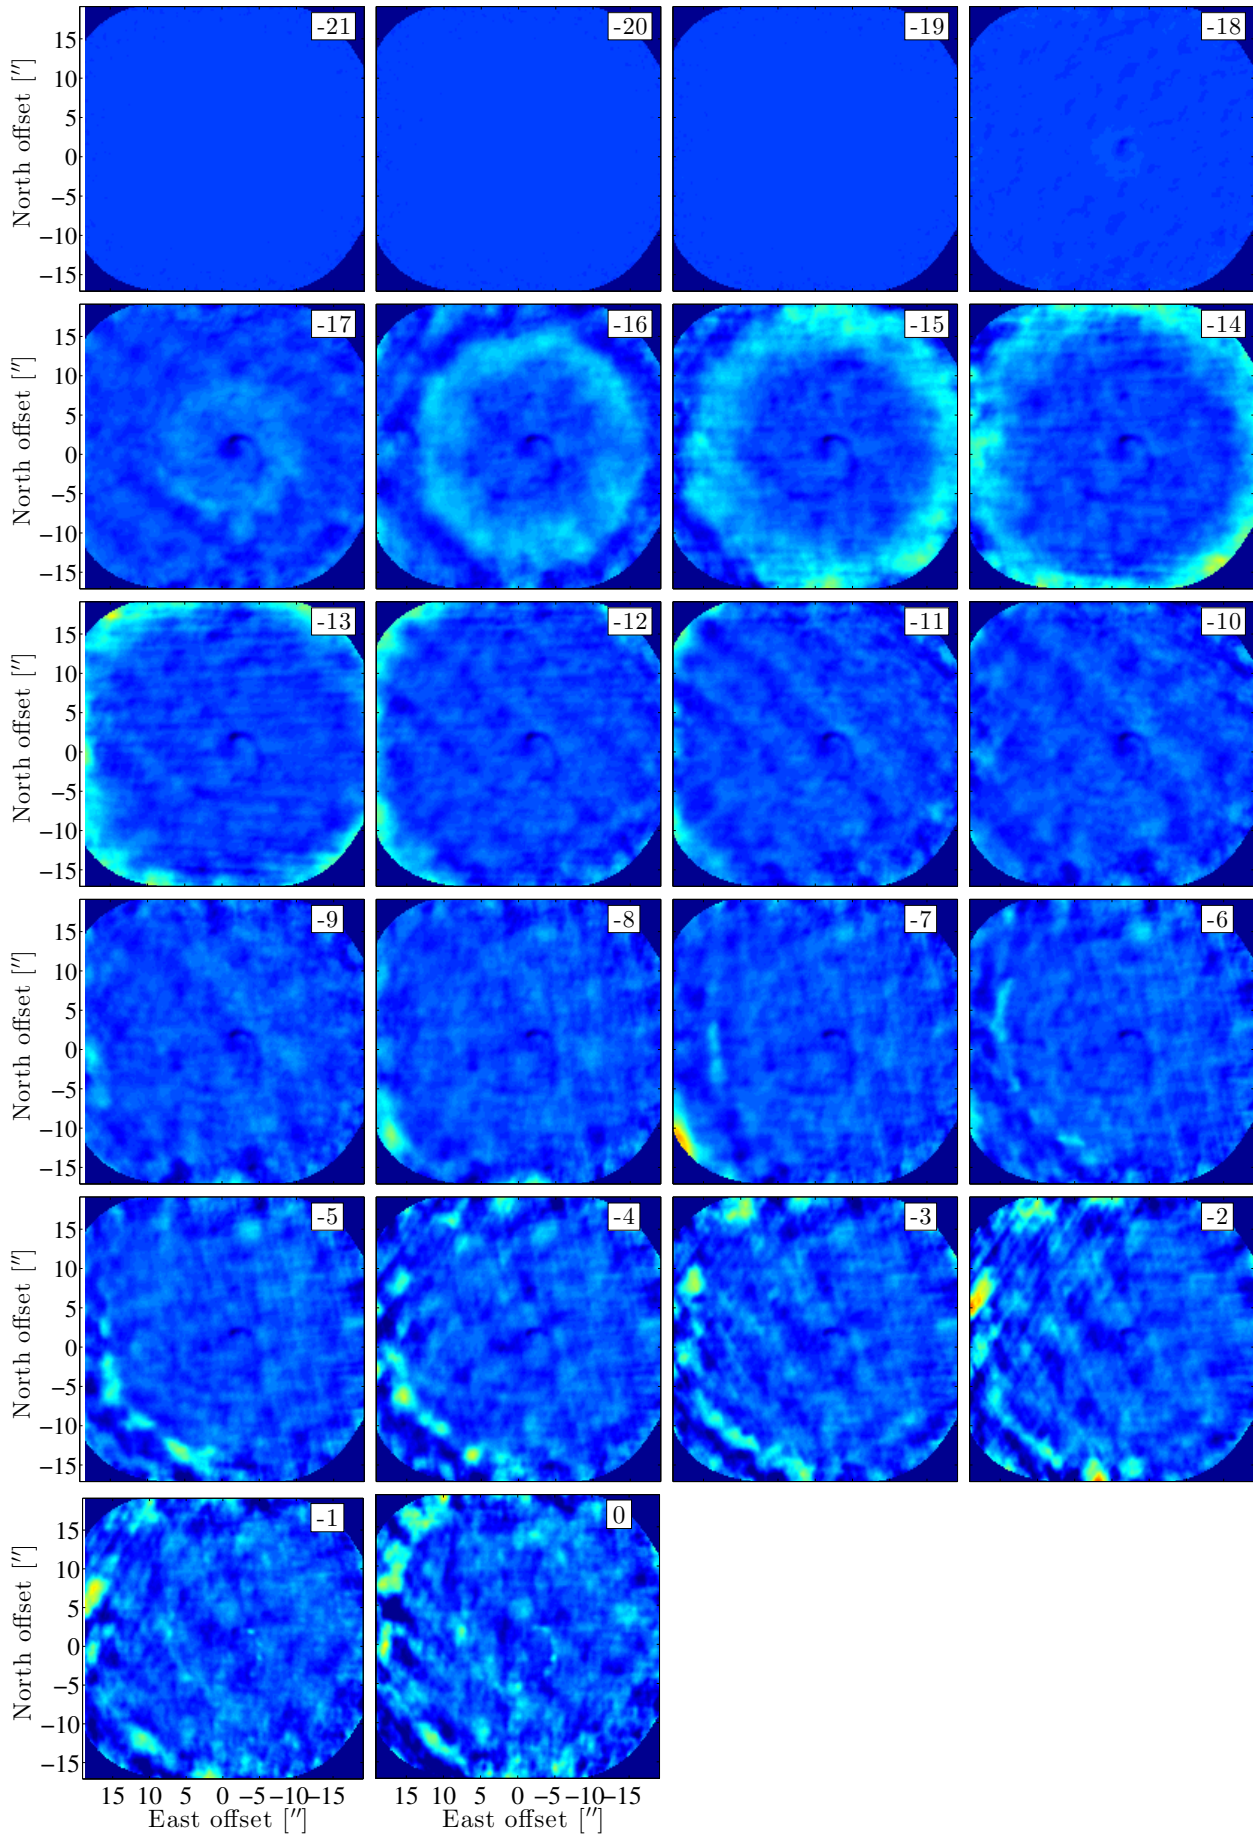

**Fig. A.2.** Channel maps from the model with  $e=0.2$  (see text for explanation). The velocity relative to the line centre of each channel is given in the upper right corner legend. Only the blue-shifted emission is shown since the maps are completely symmetric around the line centre.

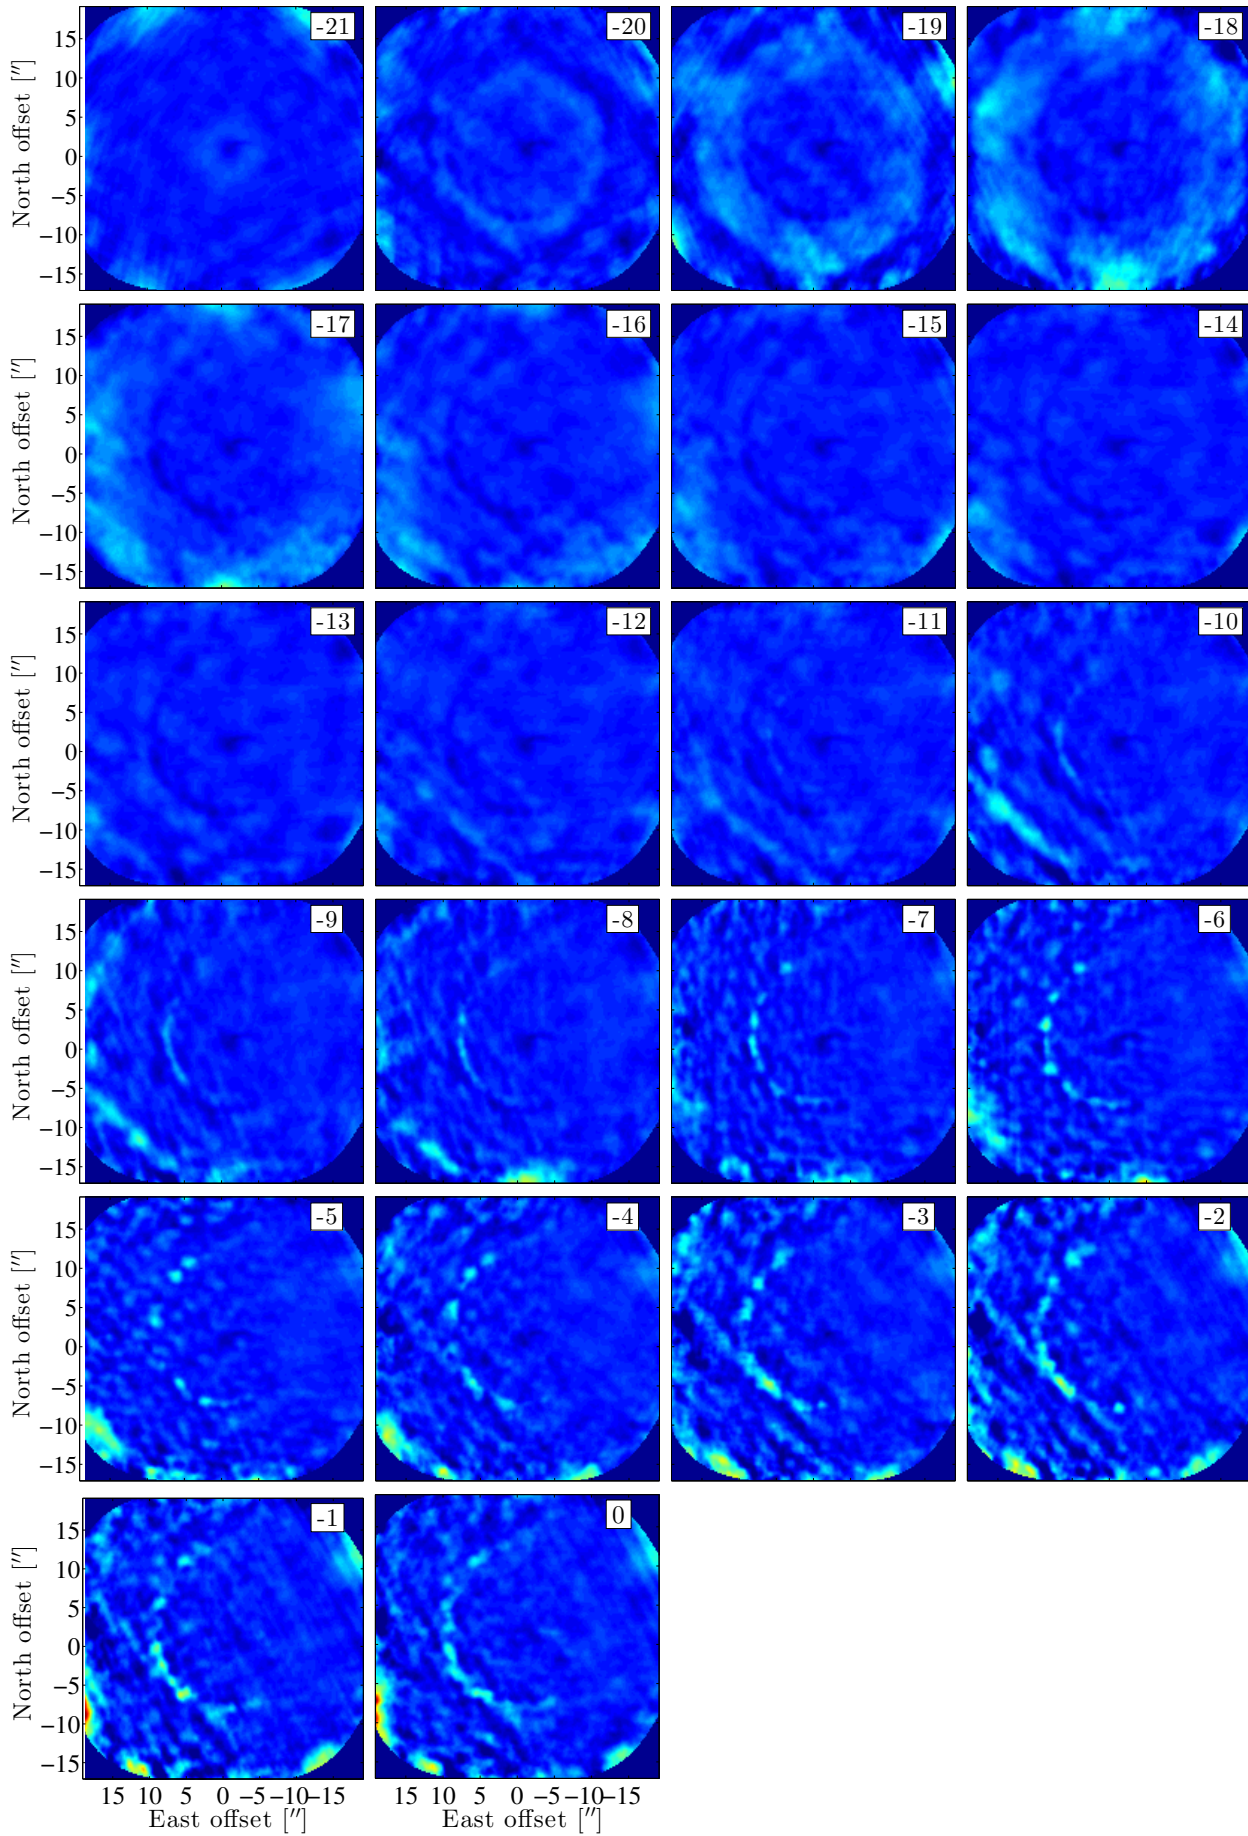

**Fig. A.3.** Channel maps from the model with  $e=0.6$  (see text for explanation). The velocity relative to the line centre of each channel is given in the upper right corner legend. Only the red-shifted emission is shown since the maps are completely symmetric around the line centre.
